# Supplementary material
Source: ML conference proceedings conference paper supplement (https://openaccess.thecvf.com/content/ICCV_2019/html/Zhou_HEMlets_Pose_Learning_ICCV_2019_paper.html)
Supplement: Supplementary file 2 [file Zhou_HEMlets_Pose_Learning_ICCV_2019_supplemental.zip]

Archive with 3 entries (3 files):
- 4275-supp.pdf
- Human36Mcomparison.mp4
- MPIINF3DHPeval.mp4
